# Supplementary material
Source: Springer Nature journal article supplement (https://www.springermedizin.de/resource/supplementary/12936_2010_1666_MOESM4_ESM.pdf/9542312)
Supplement: MOESM4 [file 9542312]

Reported fever  
N = 250

No slide requested  
30.8% (77/250)

Slide requested  
69.2% (173/250)

|        |               |               |
|--------|---------------|---------------|
| AM:    | 26.0% (20/77) | <b>RDT+ 0</b> |
| AB:    | 32.5% (25/77) | <b>RDT+ 0</b> |
| AM+AB: | 41.5% (32/77) | <b>RDT+ 0</b> |
| NT:    | 0% (0/77)     | <b>RDT+ 0</b> |

Positive slide result  
2.3% (4/173)

Negative slide result  
97.7% (169/173)

|        |             |               |
|--------|-------------|---------------|
| AM:    | 50.0% (2/4) | <b>RDT+ 1</b> |
| AB:    | 0% (0/4)    | <b>RDT+ 0</b> |
| AM+AB: | 50.0% (2/4) | <b>RDT+ 1</b> |
| NT:    | 0% (0/4)    | <b>RDT+ 0</b> |

|        |                |               |
|--------|----------------|---------------|
| AM:    | 31.4% (53/169) | <b>RDT+ 1</b> |
| AB:    | 18.3% (31/169) | <b>RDT+ 0</b> |
| AM+AB: | 49.7% (84/169) | <b>RDT+ 0</b> |
| NT:    | 0.6% (1/169)   | <b>RDT+ 0</b> |
